# Supplementary material for: A Microfluidic Cell Co-Culture Chip for the Monitoring of Interactions between Macrophages and Fibroblasts
Source: MDPI journal article supplement (doi:10.3390/bios13010070), 2022-12-31
Supplement: s1 [file s1]

## Supporting Information

# A Microfluidic Cell Co-Culture Chip for the Monitoring of Interactions between Macrophages and Fibroblasts

Pengcheng Li <sup>1,†</sup>, Feiyun Cui <sup>2,†</sup>, Heying Chen <sup>3,†</sup>, Yao Yang <sup>4,5</sup>, Gang Li <sup>6</sup>, Hongju Mao <sup>7,\*</sup> and Xiaoyan Lyu <sup>4,5,\*</sup>

<sup>1</sup> Department of Orthopedics, West China Hospital, West China School of Nursing, Sichuan University, Chengdu 610041, China

<sup>2</sup> School of Basic Medical Sciences, Harbin Medical University, Harbin 150081, China

<sup>3</sup> The Ministry of Education Key Laboratory of Clinical Diagnostics, School of Laboratory Medicine, Chongqing Medical University, Chongqing 400016, China

<sup>4</sup> Department of Dermatology, West China Hospital, Sichuan University, Chengdu 610041, China

<sup>5</sup> Laboratory of Dermatology, Clinical Institute of Inflammation and Immunology, Frontiers Science Center for Disease-related Molecular Network, West China Hospital, Sichuan University, Chengdu 610041, China

<sup>6</sup> Key Laboratory of Optoelectronic Technology and Systems, Ministry of Education, Defense Key Disciplines Lab of Novel Micro-Nano Devices and System Technology, Chongqing University, Chongqing 400044, China

<sup>7</sup> State Key Laboratory of Transducer Technology, Shanghai Institute of Microsystem and Information Technology, Chinese Academy of Sciences, Shanghai 200050, China

\* Correspondence: hjmao@mail.sim.ac.cn (H.M.); lxiaoyan@scu.edu.cn (X.L.)

† These authors contributed equally to this work.

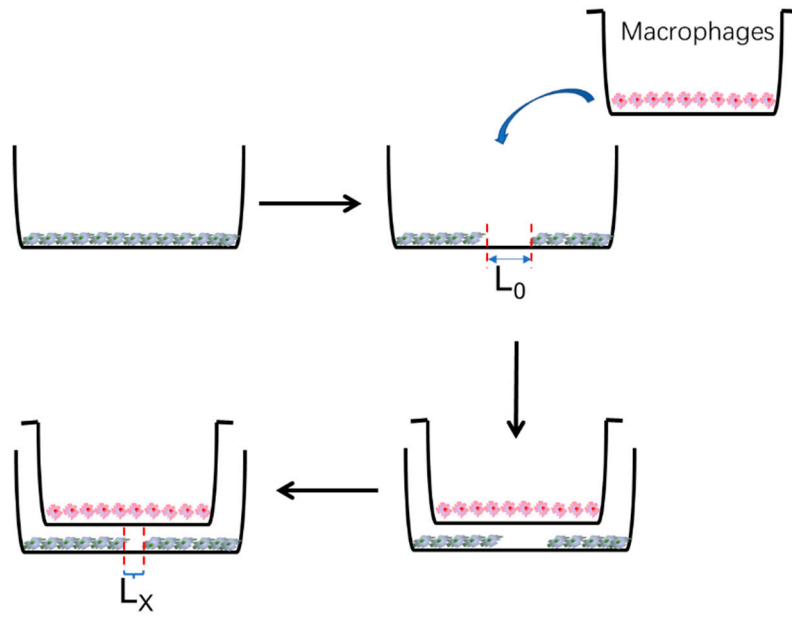

**Figure S1.** The scheme of the transwell experiment.
